# Supplementary material for: A novel fluorescent “Turn-Off/Turn-On” system for the detection of acid phosphatase activity
Source: Royal Society of Chemistry journal article supplement (doi:10.1039/c3an00375b), 2013-01-01
Supplement: c3an00375b.pdf [file c3an00375b.pdf]

*Supporting Information for*

**A Novel Fluorescent “Turn-Off/Turn-On” System for the  
Detection of Acid Phosphatase Activity**

**Pu Guo,<sup>‡</sup> Shengyong Yan,<sup>‡</sup> Yimin Zhou, Changcheng Wang, Xiaowei Xu, Xiaocheng Weng,  
Xiang Zhou\***

College of Chemistry and Molecular Sciences, Key Laboratory of Biomedical Polymers of  
Ministry of Education, Wuhan University, Hubei, Wuhan, 430072, P. R. of China, Corresponding

Author Email Address: [xzhou@whu.edu.cn](mailto:xzhou@whu.edu.cn)

## Table of Contents

|                                                                                                                                                                   |       |
|-------------------------------------------------------------------------------------------------------------------------------------------------------------------|-------|
| Materials, methods and instruments.....                                                                                                                           | S3    |
| General procedure for the synthesis of Probe 1.....                                                                                                               | S3    |
| Changes in the emission spectrum of probe 1 upon the addition of ATP, Na <sub>5</sub> P <sub>3</sub> O <sub>10</sub> ,<br>(NaPO <sub>3</sub> ) <sub>n</sub> ..... | S4-S5 |
| Linearity of ACP and fluorescence intensity.....                                                                                                                  | S5    |
| Influence of anions with large sizes.....                                                                                                                         | S6-S8 |
| References.....                                                                                                                                                   | S9    |

## Materials, methods and instrumentation.

The following solvents, compounds and reagents were commercially available: perylene tetracarboxylic dianhydride, 3-dimethylaminopropylamine, were bought from Sigma-Aldrich. Isobutanol, ethanol, NaOH, methyl iodide, toluene, ether were bought from SCRC (Shanghai, China). Acid phosphatase from potato (ACP), ATP,  $(\text{NaPO}_3)_6$ ,  $(\text{NaPO}_3)_n$  and  $\text{Na}_5\text{P}_3\text{O}_{10}$  was bought from Sigma-Aldrich.  $\text{KMoO}_4$  was bought from Alfa Aesar. The other proteins and enzymes such as BSA, thrombin, nitroreductase, tyrosinase and trypsin were bought from Sigma-Aldrich.

$^1\text{H}$  and  $^{13}\text{C}$  NMR spectra were recorded on Varian Mercury 300 spectrometers, respectively. API-ES were recorded on Agilent LC/MS 6120B. Fluorescent emission spectra were collected on PerkinElmer LS 55 with an excitation wavelength of 495 nm, the excitation and emission slit widths were 10 and 6 nm, respectively. UV absorption spectra were collected on SHIMADZU UV-2550. Quartz cuvettes with 2mL volume were used for emission measurements. Unless otherwise specified, all spectra were taken at an ambient temperature.

### General procedure for the synthesis of Probe 1<sup>[1]</sup>

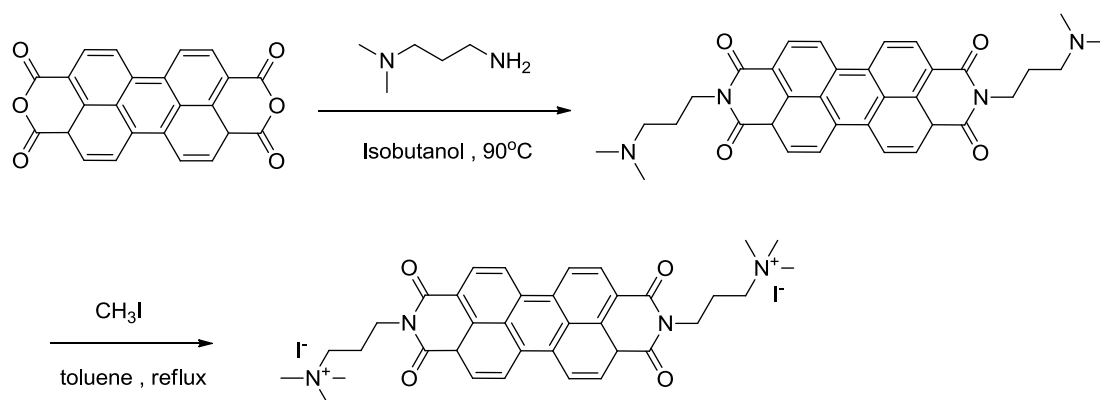

**Scheme S1.** Synthesis of Probe 1

Probe 1 was prepared by the literature methods<sup>[1]</sup>.

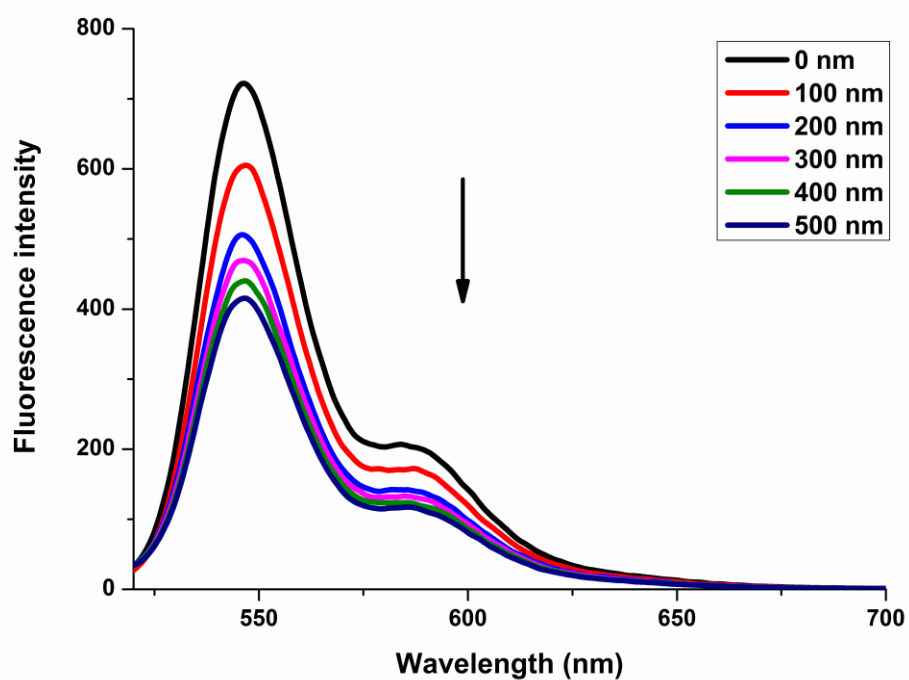

**Fig. S1** Changes in the emission spectrum of probe **1** (1 μM) upon the addition of ATP at different concentrations (0–500 nM).

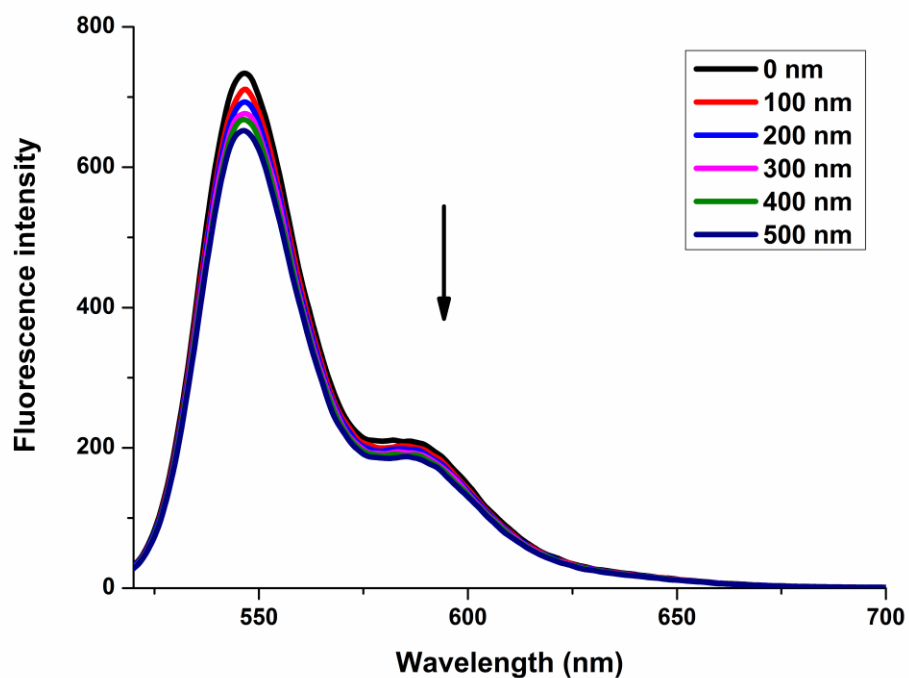

**Fig. S2** Changes in the emission spectrum of probe **1** (1 μM) upon the addition of Na<sub>5</sub>P<sub>3</sub>O<sub>10</sub> at different concentrations (0–500 nM).

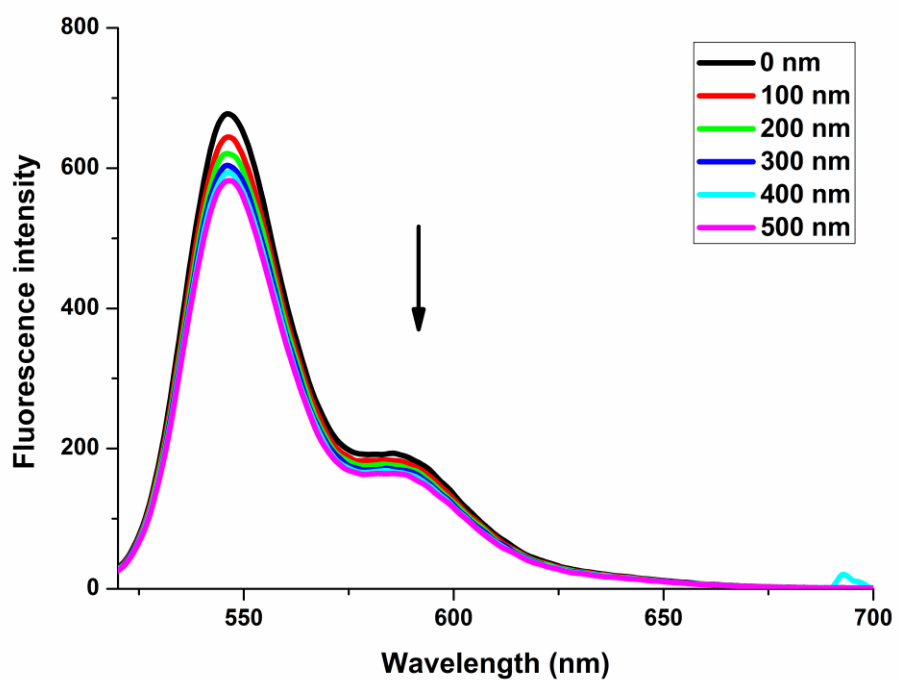

**Fig. S3** Changes in the emission spectrum of probe **1** (1 μM) upon the addition of (NaPO<sub>3</sub>)<sub>n</sub> at different concentrations (0–500 nm).

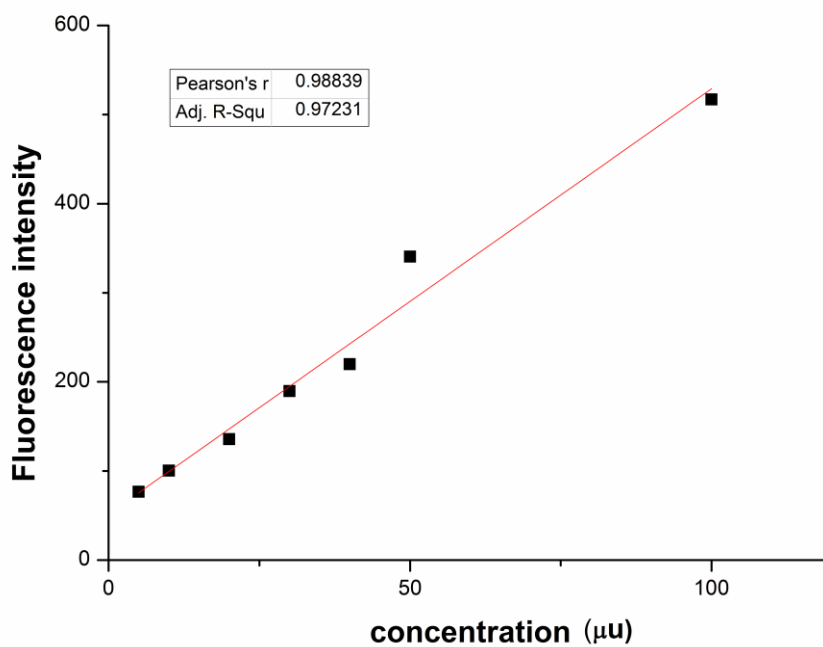

**Fig. S4** Linearity on concentrations of ACP and fluorescence intensity of reaction solution.

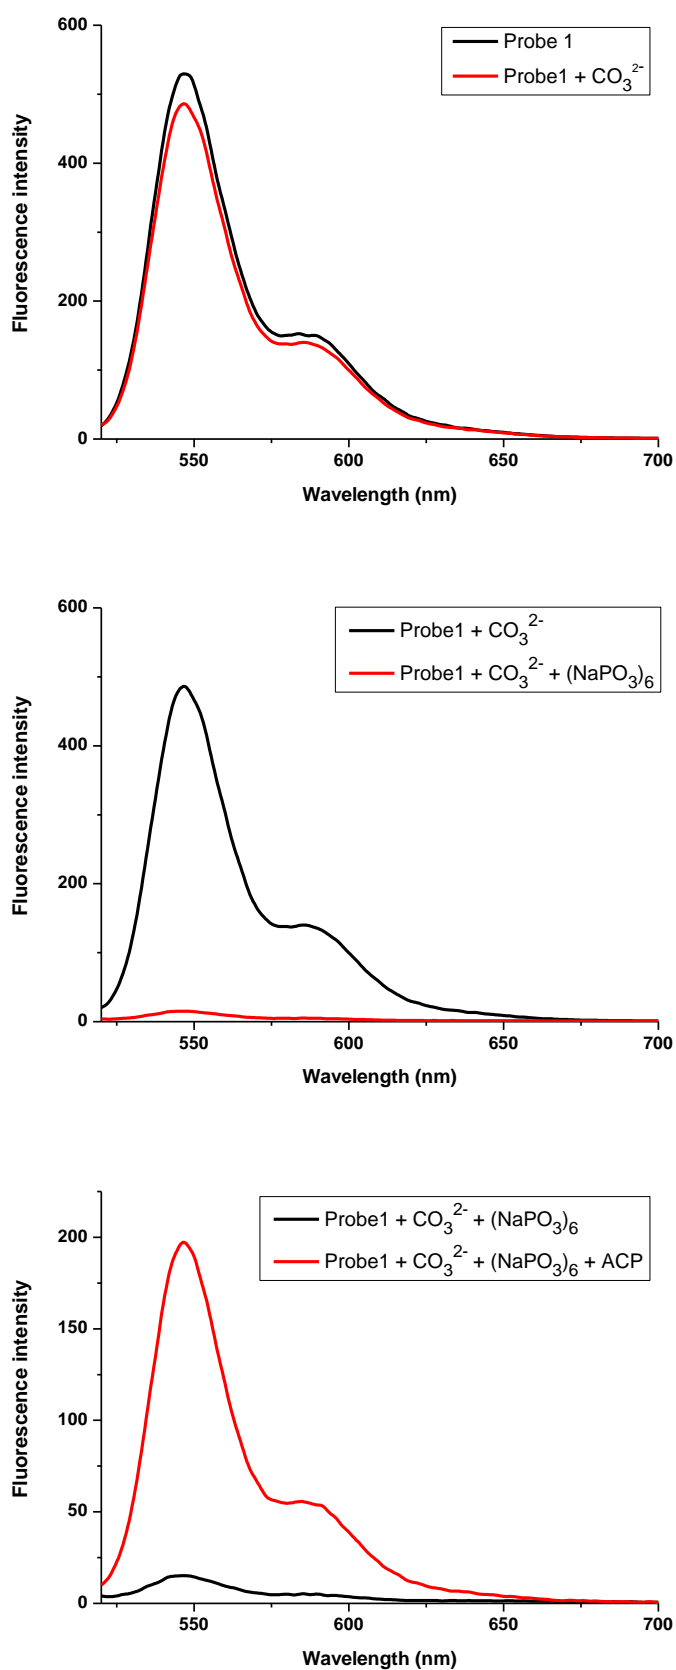

**Fig. S5** The influence of  $\text{CO}_3^{2-}$  on detection of ACP using our method. Probe 1 (1  $\mu\text{M}$ ),  $\text{Na}_2\text{CO}_3$  (4.2  $\mu\text{M}$ ),  $(\text{NaPO}_3)_6$  (700 nM), ACP (100  $\mu\text{units / mL}$ ).

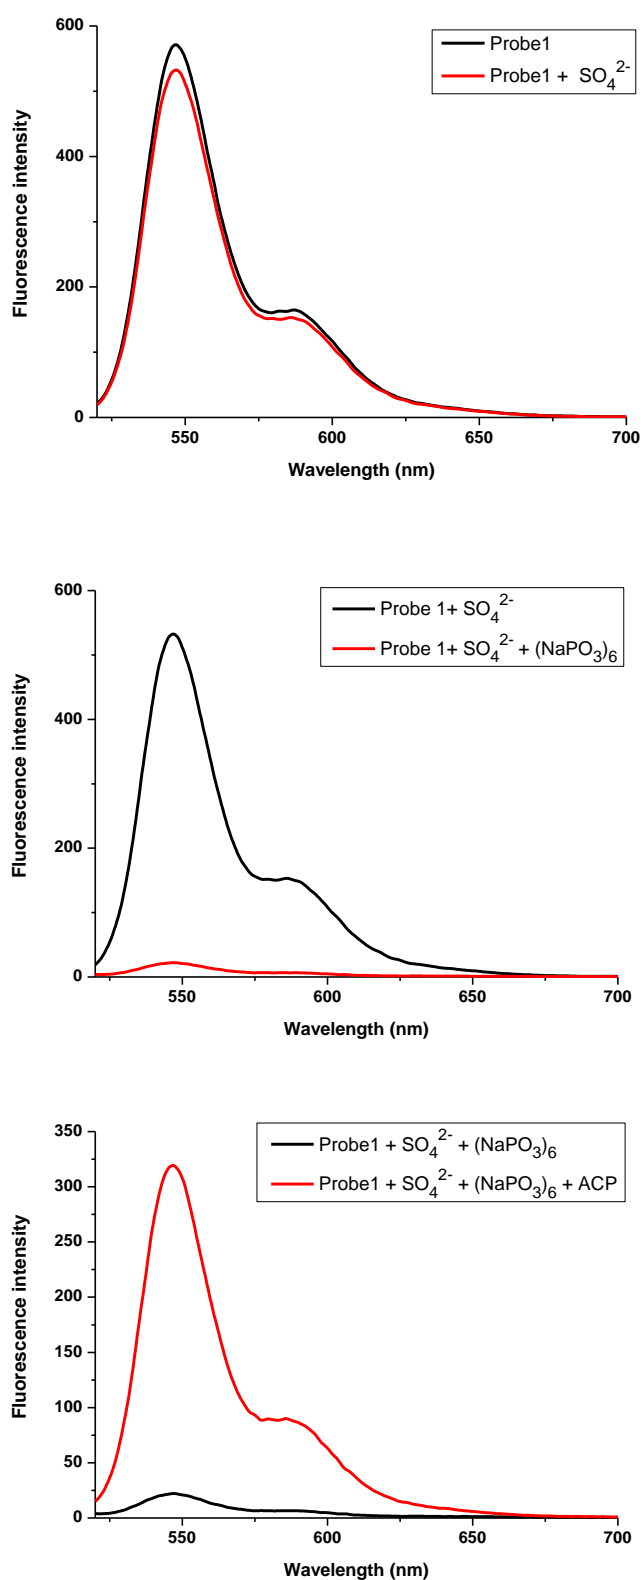

**Fig. S6** The influence of  $\text{SO}_4^{2-}$  on detection of ACP using our method. Probe 1 (1  $\mu\text{M}$ ),  $\text{Na}_2\text{SO}_4$  (4.2  $\mu\text{M}$ ),  $(\text{NaPO}_3)_6$  (700 nM), ACP (100  $\mu\text{units / mL}$ ).

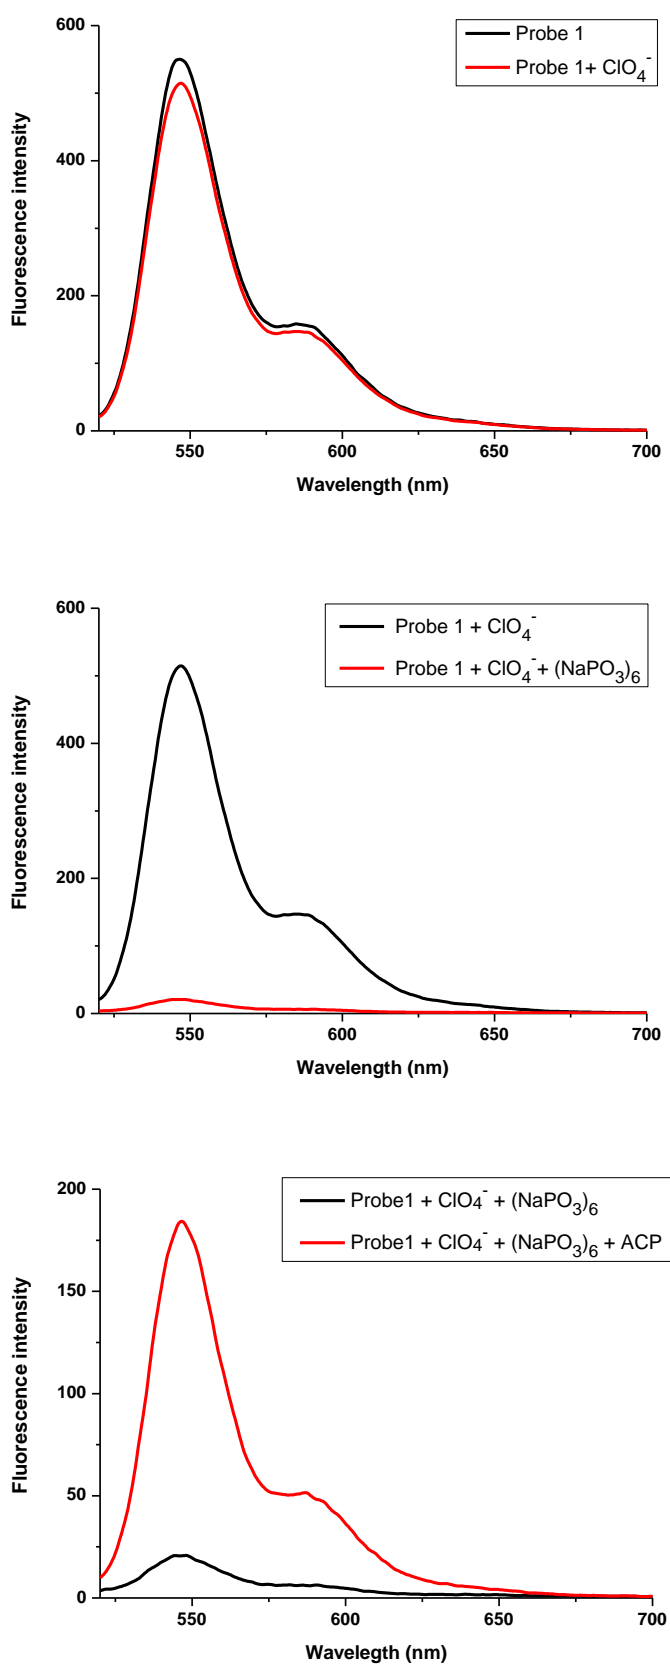

**Fig. S7** The influence of ClO<sub>4</sub><sup>-</sup> on detection of ACP using our method. Probe 1 (1 μM), NaClO<sub>4</sub> (4.2 μM), (NaPO<sub>3</sub>)<sub>6</sub> (700 nM), ACP (100 μunits / mL).



**References:**

1. B. Wang, C. Yu, *Angew. Chem. Int. Ed.* 2010, **49**, 1.
